# Supplementary material for: Repeated mutation of a developmental enhancer contributed to human thermoregulatory evolution
Source: PubMed Central journal article supplement (PMC8072367; doi:10.1073/pnas.2021722118), 2021-04-13
Supplement: pnas.2021722118.sapp.pdf [file pnas.2021722118.sapp.pdf]

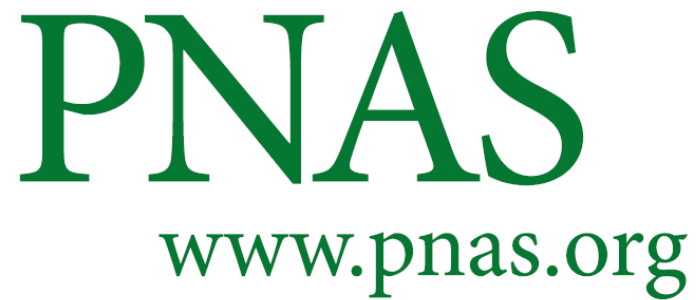

**Supplementary Information for  
Repeated mutation of a developmental enhancer contributed to  
the human thermoregulatory evolution**

Daniel Aldea, Yuji Atsuta, Blerina Kokalari, Stephen Schaffner, Rexxi D. Prasasya, Adam Aharoni,  
Heather L. Dingwall, Bailey Warder, Yana G. Kamberov

Yana G. Kamberov  
Email: [yana2@penncmedicine.upenn.edu](mailto:yana2@penncmedicine.upenn.edu)

**This PDF file includes:**

Figures S1 to S7  
Tables S1 to S4  
SI References

**A** List of Conserved Elements within En1 TAD in mm10

|                |                                                       |                                                             |                                     |
|----------------|-------------------------------------------------------|-------------------------------------------------------------|-------------------------------------|
| <b>Legend:</b> | 1. DNase I hypersensitivity from mouse limbs at E11.5 | 3. H3K27Ac from Normal human Epidermal keratinocytes (NHEK) | 5. Human Accelerated Regions (HARs) |
|                | 2. C-capture from mouse limbs at E13.5                | 4. Deaf1 ChIP-seq peaks from culture human keratinocytes    | 6. Conserved element prioritized    |

| N° | Chr  | Coordinates | 1         | 2 | 3 | 4 | 5 | 6 | N°  | Chr  | Coordinates | 1         | 2 | 3 | 4 | 5 | 6 |
|----|------|-------------|-----------|---|---|---|---|---|-----|------|-------------|-----------|---|---|---|---|---|
| 1  | chr1 | 120591009   | 120591104 |   |   |   |   |   | 106 | chr1 | 121032467   | 121032517 |   |   |   |   |   |
| 2  | chr1 | 120598188   | 120598297 |   |   |   |   |   | 107 | chr1 | 121046637   | 121047008 |   |   |   |   |   |
| 3  | chr1 | 120598340   | 120598390 |   |   |   |   |   | 108 | chr1 | 121047045   | 121047283 |   |   |   |   |   |
| 4  | chr1 | 120600010   | 120600554 |   |   |   |   |   | 109 | chr1 | 121047309   | 121047395 |   |   |   |   |   |
| 5  | chr1 | 120602217   | 120602283 |   |   |   |   |   | 110 | chr1 | 121050621   | 121050692 |   |   |   |   |   |
| 6  | chr1 | 120602295   | 120602437 |   |   |   |   |   | 111 | chr1 | 121051324   | 121051472 |   |   |   |   |   |
| 7  | chr1 | 120602440   | 120602556 |   |   |   |   |   | 112 | chr1 | 121051480   | 121051551 |   |   |   |   |   |
| 8  | chr1 | 120602984   | 120602753 |   |   |   |   |   | 113 | chr1 | 121054103   | 121054259 |   |   |   |   |   |
| 9  | chr1 | 120602790   | 120602841 |   |   |   |   |   | 114 | chr1 | 121056740   | 121056816 |   |   |   |   |   |
| 10 | chr1 | 120602923   | 120603031 |   |   |   |   |   | 115 | chr1 | 121069303   | 121069365 |   |   |   |   |   |
| 11 | chr1 | 120605018   | 120605127 |   |   |   |   |   | 116 | chr1 | 121069395   | 121069465 |   |   |   |   |   |
| 12 | chr1 | 120607550   | 120607619 |   |   |   |   |   | 117 | chr1 | 121070294   | 121070348 |   |   |   |   |   |
| 13 | chr1 | 120607712   | 120607777 |   |   |   |   |   | 118 | chr1 | 121075119   | 121075172 |   |   |   |   |   |
| 14 | chr1 | 120607866   | 120607987 |   |   |   |   |   | 119 | chr1 | 121087368   | 121087417 |   |   |   |   |   |
| 15 | chr1 | 120615893   | 120615948 |   |   |   |   |   | 120 | chr1 | 121087894   | 121088031 |   |   |   |   |   |
| 16 | chr1 | 120621495   | 120621577 |   |   |   |   |   | 121 | chr1 | 121088063   | 121088164 |   |   |   |   |   |
| 17 | chr1 | 120623207   | 120623409 |   |   |   |   |   | 122 | chr1 | 121088168   | 121088241 |   |   |   |   |   |
| 18 | chr1 | 120623411   | 120623516 |   |   |   |   |   | 123 | chr1 | 121096210   | 121096270 |   |   |   |   |   |
| 19 | chr1 | 120624808   | 120624874 |   |   |   |   |   | 124 | chr1 | 121096963   | 121097041 |   |   |   |   |   |
| 20 | chr1 | 120625309   | 120625433 |   |   |   |   |   | 125 | chr1 | 121097211   | 121097366 |   |   |   |   |   |
| 21 | chr1 | 120627393   | 120627472 |   |   |   |   |   | 126 | chr1 | 121097372   | 121097600 |   |   |   |   |   |
| 22 | chr1 | 120643993   | 120644048 |   |   |   |   |   | 127 | chr1 | 121097604   | 121097775 |   |   |   |   |   |
| 23 | chr1 | 120644052   | 120644132 |   |   |   |   |   | 128 | chr1 | 121099214   | 121099268 |   |   |   |   |   |
| 24 | chr1 | 120646765   | 120646955 |   |   |   |   |   | 129 | chr1 | 121101392   | 121101434 |   |   |   |   |   |
| 25 | chr1 | 120650281   | 120650345 |   |   |   |   |   | 130 | chr1 | 121101438   | 121101536 |   |   |   |   |   |
| 26 | chr1 | 120659671   | 120659832 |   |   |   |   |   | 131 | chr1 | 121101604   | 121101740 |   |   |   |   |   |
| 27 | chr1 | 120671678   | 120671765 |   |   |   |   |   | 132 | chr1 | 121117042   | 121117138 |   |   |   |   |   |
| 28 | chr1 | 120680894   | 120680943 |   |   |   |   |   | 133 | chr1 | 121111715   | 121117228 |   |   |   |   |   |
| 29 | chr1 | 120686909   | 120686985 |   |   |   |   |   | 134 | chr1 | 121117236   | 121117330 |   |   |   |   |   |
| 30 | chr1 | 120692870   | 120692942 |   |   |   |   |   | 135 | chr1 | 121117361   | 121117421 |   |   |   |   |   |
| 31 | chr1 | 120693948   | 120693960 |   |   |   |   |   | 136 | chr1 | 121117493   | 121117495 |   |   |   |   |   |
| 32 | chr1 | 120693066   | 120693155 |   |   |   |   |   | 137 | chr1 | 121121375   | 121121452 |   |   |   |   |   |
| 33 | chr1 | 120703968   | 120704057 |   |   |   |   |   | 138 | chr1 | 121121530   | 121121582 |   |   |   |   |   |
| 34 | chr1 | 120715353   | 120715407 |   |   |   |   |   | 139 | chr1 | 121122653   | 121122704 |   |   |   |   |   |
| 35 | chr1 | 120715447   | 120715672 |   |   |   |   |   | 140 | chr1 | 121122710   | 121122899 |   |   |   |   |   |
| 36 | chr1 | 120727572   | 120727631 |   |   |   |   |   | 141 | chr1 | 121122902   | 121123061 |   |   |   |   |   |
| 37 | chr1 | 120727748   | 120727798 |   |   |   |   |   | 142 | chr1 | 121123064   | 121123119 |   |   |   |   |   |
| 38 | chr1 | 120729086   | 120729233 |   |   |   |   |   | 143 | chr1 | 121123143   | 121123238 |   |   |   |   |   |
| 39 | chr1 | 120729261   | 120729316 |   |   |   |   |   | 144 | chr1 | 121127101   | 121127184 |   |   |   |   |   |
| 40 | chr1 | 120734650   | 120734706 |   |   |   |   |   | 145 | chr1 | 121130584   | 121130641 |   |   |   |   |   |
| 41 | chr1 | 120741558   | 120741623 |   |   |   |   |   | 146 | chr1 | 121136381   | 121136552 |   |   |   |   |   |
| 42 | chr1 | 120749344   | 120749394 |   |   |   |   |   | 147 | chr1 | 121136582   | 121136637 |   |   |   |   |   |
| 43 | chr1 | 120749404   | 120749481 |   |   |   |   |   | 148 | chr1 | 121143058   | 121143116 |   |   |   |   |   |
| 44 | chr1 | 120753149   | 120753213 |   |   |   |   |   | 149 | chr1 | 121143145   | 121143208 |   |   |   |   |   |
| 45 | chr1 | 120753250   | 120753299 |   |   |   |   |   | 150 | chr1 | 121155517   | 121155244 |   |   |   |   |   |
| 46 | chr1 | 120754341   | 120754474 |   |   |   |   |   | 151 | chr1 | 121168689   | 121168691 |   |   |   |   |   |
| 47 | chr1 | 120754476   | 120754534 |   |   |   |   |   | 152 | chr1 | 121176298   | 121176377 |   |   |   |   |   |
| 48 | chr1 | 120754586   | 120754635 |   |   |   |   |   | 153 | chr1 | 121177154   | 121177468 |   |   |   |   |   |
| 49 | chr1 | 120755496   | 120755549 |   |   |   |   |   | 154 | chr1 | 121180887   | 121180980 |   |   |   |   |   |
| 50 | chr1 | 120757086   | 120757184 |   |   |   |   |   | 155 | chr1 | 121180992   | 121181047 |   |   |   |   |   |
| 51 | chr1 | 120757186   | 120757349 |   |   |   |   |   | 156 | chr1 | 121224243   | 121224401 |   |   |   |   |   |
| 52 | chr1 | 120760999   | 120761049 |   |   |   |   |   | 157 | chr1 | 121226826   | 121227009 |   |   |   |   |   |
| 53 | chr1 | 120770402   | 120770562 |   |   |   |   |   | 158 | chr1 | 121227119   | 121227228 |   |   |   |   |   |
| 54 | chr1 | 120770499   | 120770564 |   |   |   |   |   | 159 | chr1 | 121227169   | 121227228 |   |   |   |   |   |
| 55 | chr1 | 120795644   | 120795727 |   |   |   |   |   | 160 | chr1 | 121227234   | 121227766 |   |   |   |   |   |
| 56 | chr1 | 120795732   | 120795785 |   |   |   |   |   | 161 | chr1 | 121237491   | 121237739 |   |   |   |   |   |
| 57 | chr1 | 120795790   | 120795912 |   |   |   |   |   | 162 | chr1 | 121237744   | 121237855 |   |   |   |   |   |
| 58 | chr1 | 120795919   | 120796012 |   |   |   |   |   | 163 | chr1 | 121254210   | 121254413 |   |   |   |   |   |
| 59 | chr1 | 120796024   | 120796139 |   |   |   |   |   | 164 | chr1 | 121254791   | 121254850 |   |   |   |   |   |
| 60 | chr1 | 120810934   | 120810991 |   |   |   |   |   | 165 | chr1 | 121290958   | 121291077 |   |   |   |   |   |
| 61 | chr1 | 120811068   | 120811128 |   |   |   |   |   | 166 | chr1 | 121291134   | 121291207 |   |   |   |   |   |
| 62 | chr1 | 120816565   | 120816680 |   |   |   |   |   | 167 | chr1 | 121298130   | 121298192 |   |   |   |   |   |
| 63 | chr1 | 120817814   | 120817864 |   |   |   |   |   | 168 | chr1 | 121304358   | 121304418 |   |   |   |   |   |
| 64 | chr1 | 120825152   | 120825217 |   |   |   |   |   | 169 | chr1 | 121304448   | 121304541 |   |   |   |   |   |
| 65 | chr1 | 120831635   | 120831712 |   |   |   |   |   | 170 | chr1 | 121307887   | 121307942 |   |   |   |   |   |
| 66 | chr1 | 120842548   | 120842630 |   |   |   |   |   | 171 | chr1 | 121308031   | 121308154 |   |   |   |   |   |
| 67 | chr1 | 120859206   | 120859284 |   |   |   |   |   | 172 | chr1 | 121308271   | 121308340 |   |   |   |   |   |
| 68 | chr1 | 120859288   | 120859523 |   |   |   |   |   | 173 | chr1 | 121314739   | 121314792 |   |   |   |   |   |
| 69 | chr1 | 120859671   | 120859747 |   |   |   |   |   | 174 | chr1 | 121344380   | 121344480 |   |   |   |   |   |
| 70 | chr1 | 120868488   | 120868554 |   |   |   |   |   | 175 | chr1 | 121344484   | 121344538 |   |   |   |   |   |
| 71 | chr1 | 120868560   | 120868653 |   |   |   |   |   | 176 | chr1 | 121355789   | 121355884 |   |   |   |   |   |
| 72 | chr1 | 120868843   | 120868969 |   |   |   |   |   | 177 | chr1 | 121355892   | 121355949 |   |   |   |   |   |
| 73 | chr1 | 120872585   | 120872694 |   |   |   |   |   | 178 | chr1 | 121355955   | 121356029 |   |   |   |   |   |
| 74 | chr1 | 120872907   | 120873009 |   |   |   |   |   | 179 | chr1 | 121370913   | 121370991 |   |   |   |   |   |
| 75 | chr1 | 120883400   | 120883465 |   |   |   |   |   | 180 | chr1 | 121371381   | 121371524 |   |   |   |   |   |
| 76 | chr1 | 120883467   | 120883526 |   |   |   |   |   | 181 | chr1 | 121371531   | 121371666 |   |   |   |   |   |
| 77 | chr1 | 120883553   | 120883664 |   |   |   |   |   | 182 | chr1 | 121371703   | 121371754 |   |   |   |   |   |
| 78 | chr1 | 120883824   | 120883931 |   |   |   |   |   | 183 | chr1 | 121371793   | 121371860 |   |   |   |   |   |
| 79 | chr1 | 120886022   | 120886086 |   |   |   |   |   | 184 | chr1 | 121371918   | 121371983 |   |   |   |   |   |
| 80 | chr1 | 120886126   | 120886179 |   |   |   |   |   | 185 | chr1 | 121379299   | 121379443 |   |   |   |   |   |
| 81 | chr1 | 120886245   | 120886256 |   |   |   |   |   | 186 | chr1 | 121379500   | 121379604 |   |   |   |   |   |
| 82 | chr1 | 120887118   | 120887234 |   |   |   |   |   | 187 | chr1 | 121381958   | 121382018 |   |   |   |   |   |
| 83 | chr1 | 120910913   | 120911071 |   |   |   |   |   | 188 | chr1 | 121388490   | 121388588 |   |   |   |   |   |
| 84 | chr1 | 120912165   | 120912320 |   |   |   |   |   | 189 | chr1 | 121388593   | 121388648 |   |   |   |   |   |
| 85 | chr1 | 120912323   | 120912407 |   |   |   |   |   | 190 | chr1 | 121388681   | 121388744 |   |   |   |   |   |
| 86 | chr1 | 120912409   | 120912498 |   |   |   |   |   | 191 | chr1 | 121390182   | 121390306 |   |   |   |   |   |
| 87 | chr1 | 120912527   | 120912591 |   |   |   |   |   | 192 | chr1 | 121390308   | 121390390 |   |   |   |   |   |
| 88 | chr1 | 120941703   | 120941870 |   |   |   |   |   | 193 | chr1 | 121390500   | 121390697 |   |   |   |   |   |
| 89 | chr1 | 120941874   | 120942147 |   |   |   |   |   | 194 | chr1 | 121390893   | 121391056 |   |   |   |   |   |
| 90 | chr1 | 120951771   | 120951826 |   |   |   |   |   | 195 | chr1 | 121391107   | 121391376 |   |   |   |   |   |
| 91 | chr1 | 120951917   | 120951967 |   |   |   |   |   | 196 | chr1 | 121392525   | 121392914 |   |   |   |   |   |
| 92 | chr1 | 120953043   | 120953094 |   |   |   |   |   | 197 | chr1 | 121392970   | 121393078 |   |   |   |   |   |
| 9  |      |             |           |   |   |   |   |   |     |      |             |           |   |   |   |   |   |

**B** List of *En1* Candidates Enhancers (ECEs) tested *in vivo*

|       | Coordinates (mm10)  | 1               | 2                   |
|-------|---------------------|-----------------|---------------------|
| ECE1  | 120600025-120600904 | 4               |                     |
| ECE2  | 120601976-120602486 | 5,6             | <i>En1</i> promoter |
| ECE3  | 120604762-120605416 | 11              |                     |
| ECE4  | 120607302-120608054 | 12,13,14        |                     |
| ECE5  | 120621472-120622204 | 16              |                     |
| ECE6  | 120692742-120693280 | 30,31,32        |                     |
| ECE7  | 120714773-120716154 | 34,35           |                     |
| ECE8  | 120756823-120757766 | 50,51           |                     |
| ECE9  | 120760766-120761883 | 52              |                     |
| ECE10 | 120842070-120843227 | 66              |                     |
| ECE11 | 120910517-120911428 | 83              |                     |
| ECE12 | 120961285-120962463 | 94,95,96        |                     |
| ECE13 | 120963768-120964907 | 97,98           |                     |
| ECE14 | 120969875-120970619 | 99              |                     |
| ECE15 | 121005143-121006490 | 101,102         |                     |
| ECE16 | 121050854-121051942 | 110,111,112     |                     |
| ECE17 | 121053456-121054528 | 113             |                     |
| ECE18 | 121096764-121097826 | 124,125,126,127 | This study          |
| ECE19 | 121154371-121155567 | 150             |                     |
| ECE20 | 121176848-121178300 | 153             |                     |
| ECE21 | 121179419-121181061 | 154,155         |                     |
| ECE22 | 121223853-121224693 | 156             |                     |
| ECE23 | 121394405-121395702 | 201,202         |                     |

**Legend:**

1. Conserved element contained within the ECE tested *in vivo* (see identification number in Extended Data 1a)

2. Reporter expression in *En1* positives domain in mouse ventral limb at P2.5

Positive

Negative

**C** Human derived substitutions relative to chimp/gorilla or to chimp

|       | Human derived substitutions relative to chimp/gorilla | % of the ECE | Human derived substitutions relative to chimp | % of the ECE |
|-------|-------------------------------------------------------|--------------|-----------------------------------------------|--------------|
| ECE2  | 5                                                     | 0.93         | 12                                            | 2.24         |
| ECE8  | 5                                                     | 0.51         | 11                                            | 1.13         |
| ECE18 | 13                                                    | 1.33         | 24                                            | 2.46         |
| ECE20 | 21                                                    | 1.51         | 28                                            | 2.01         |
| ECE23 | 7                                                     | 0.81         | 13                                            | 1.50         |

**Fig. S1. Genomic location and characteristics of conserved elements and *Engrailed 1* Candidate Enhancers (ECE).** (A) Coordinates (mm10) of 209 conserved elements within the EN1 TAD identified by phastCons across placental mammals. Each element has a corresponding identifier (N). Criteria used to prioritize conserved elements: overlap with published datasets of epigenomic marks associated with enhancer presence (columns 1-3) (1, 2); overlap with DEAF1 ChIP-seq peaks, which is a transcription factor we recently showed positively regulates *Engrailed 1* in human and mouse keratinocytes (column 4) (3); overlap with annotated human accelerated regions (HARs) (column 5) (4-6). Overlap is indicated in red. Prioritized conserved elements which were used as kernels for ECEs are highlighted in orange in column 6. (B) Genomic coordinates

(mm10) of top 23 ECEs tested in mouse transgenic assays. Conserved elements (N) contained within each ECE are listed in column 1. ECEs that induced eGFP-positive clones within the En1-positive expression domain (basal keratinocytes of volar limb) are indicated by orange color in column 2. **(C)** Human derived substitutions relative to chimp/gorilla, or to chimp are listed as absolute numbers or percentages calculated with respect to the total length in nucleotides of each positive ECE. ECE18 is boxed in red.

**A** Enhancer activity of positive ECEs in mouse ventral limb

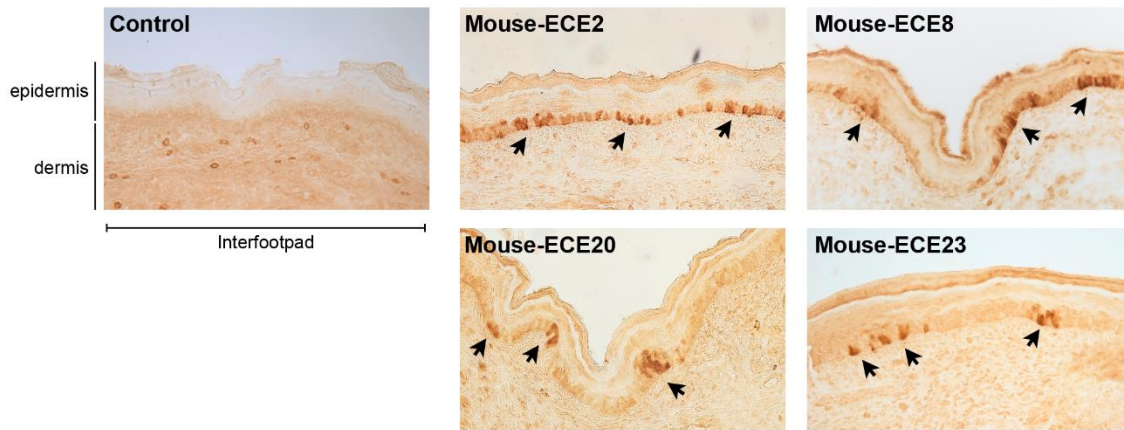

**B** Activity of positive ECEs in mouse footpad

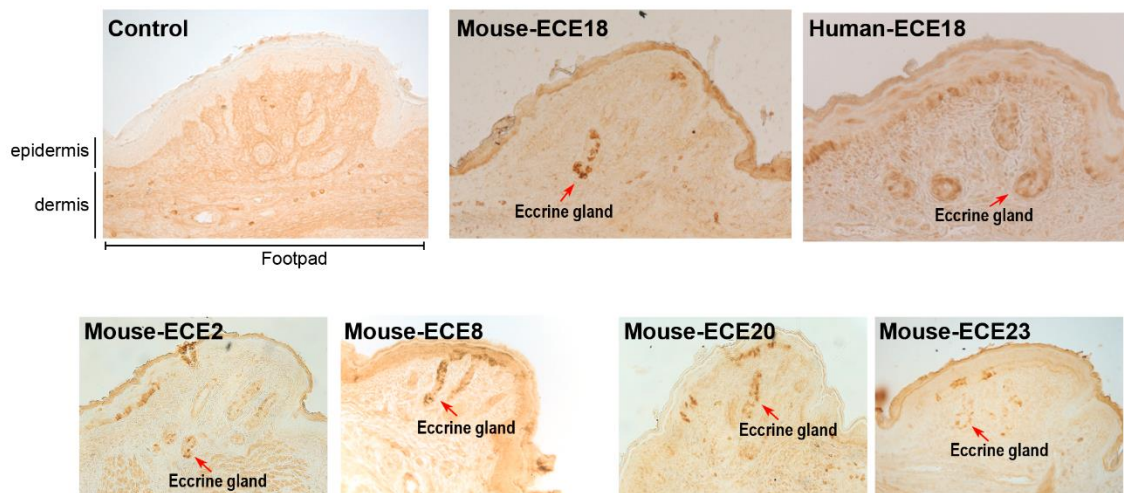

**C** ECE18 enhancer activity in mouse dorsal limb

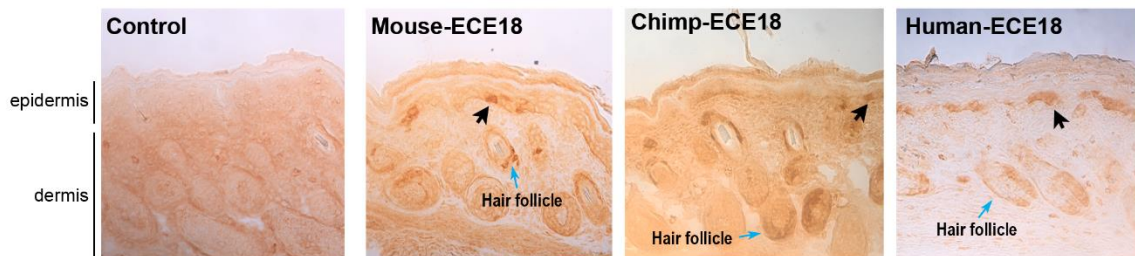

**Fig. S2. Enhancer activity of positives ECEs in transgenic mouse skin.** In all panels representative images of GFP antibody-stained sections of limbs from lentiviral-mediated

transgenic mice. Cross-sections of stained ventral mouse limbs **(A)**, and footpads **(B)** at P2.5 stage of positives ECEs identified in this study are shown. The eccrine glands of the footpads in **(B)** (red arrow) are undergoing differentiation as evidenced by their invagination into the dermal layer. **(C)** Representative images of P2.5 dorsal distal autopod skin from mouse, chimpanzee and human ECE18 lentiviral-mediated transgenic mice. The large hair follicles (blue arrow) which like eccrine glands derive from basal keratinocytes during development **(7, 8)**, and are characteristic of dorsal skin are also present. eGFP expression was detected by anti-GFP antibody and HRP/DAB coupled immunohistochemistry. GFP positive clones (black arrow). Control images from transgenic skin infected with lentivirus carrying minimal promoter and eGFP-reporter cassette alone.



## A Multiz alignment of placental mammals centered on human ECE18

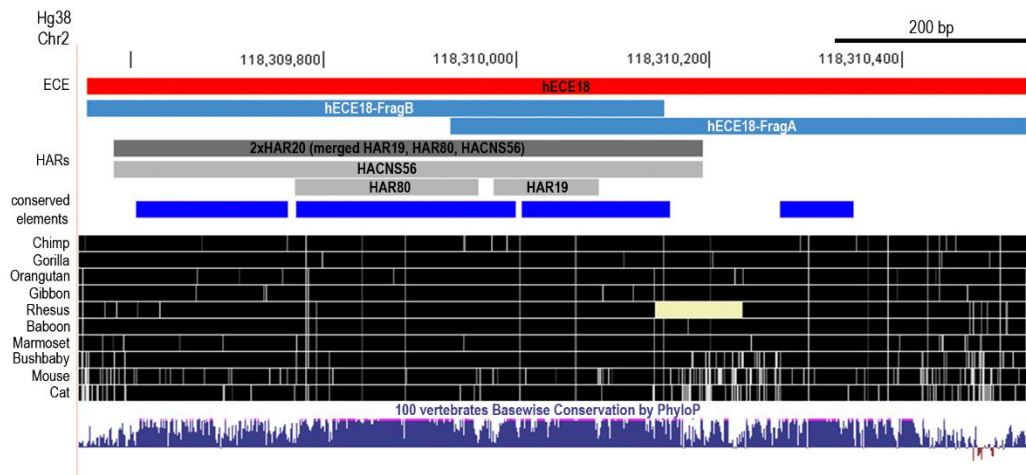

## B Bidirectional luciferase lentiviral vector

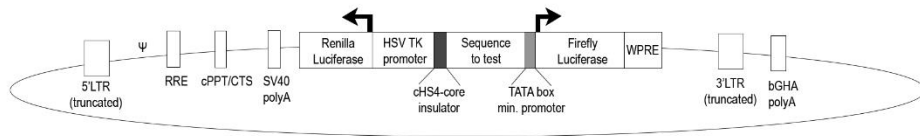

## C Coordinates of ECE18 homologs and others fragments tested *in vitro*

| Species (build)    | Chr      | ECE18               | ECE18-FragA         | ECE18-FragB         | 2xHAR20             | HAR19               | HAR80               |
|--------------------|----------|---------------------|---------------------|---------------------|---------------------|---------------------|---------------------|
|                    |          | Coordinates         | Coordinates         | Coordinates         | Coordinates         | Coordinates         | Coordinates         |
| Mouse (mm10)       | Chr1     | 121096764-121097826 | 121096764-121097440 | -                   | -                   | -                   | -                   |
| Human (hg38)       | Chr2     | 118309555-118310531 | 118309932-118310531 | 118309555-118310154 | 118309583-118310193 | 118309977-118310085 | 118309771-118309961 |
| Chimp (panTro6)    | Chr2B    | 4758321-4759295     | 4758698-4759295     | -                   | -                   | -                   | -                   |
| Gorilla (gorGor4)  | Chr2B    | -                   | 7012616-7013213     | -                   | -                   | -                   | -                   |
| Macaque (rheMac10) | Chr12    | 12819060-12820038   | 12819060-12819658   | -                   | -                   | -                   | -                   |
| Marmoset (calJac3) | Chr6     | 92356458-92357434   | -                   | -                   | -                   | -                   | -                   |
| Bushbaby (otoGar3) | GL873578 | 3870683-3871687     | -                   | -                   | -                   | -                   | -                   |
| Cat (felCat9)      | C1       | 122367966-122368951 | 122367966-122368592 | -                   | -                   | -                   | -                   |

## D Human ECE18<sup>FragA</sup> enhancer activity in mouse limb

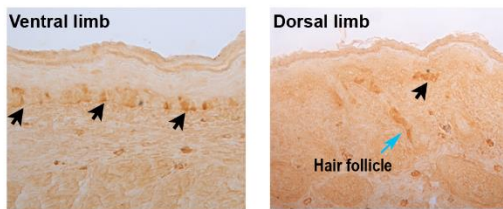

## E Activity of ECE18<sup>FragA</sup> homologs

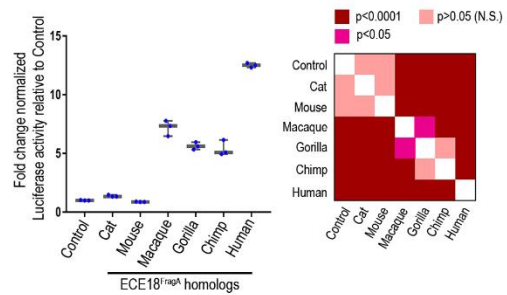

## F Allele frequencies of human variants

● rs56967129 (data from 1000 Genomes Project Phase 3)

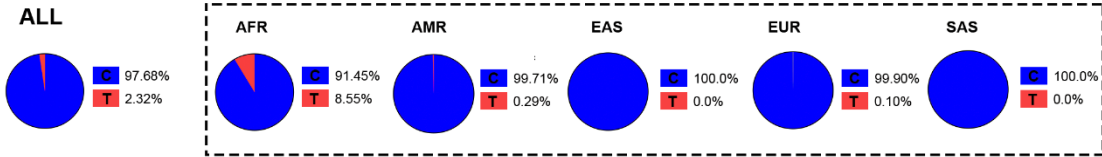

● rs146778681 (data from 1000 Genomes Project Phase 3)

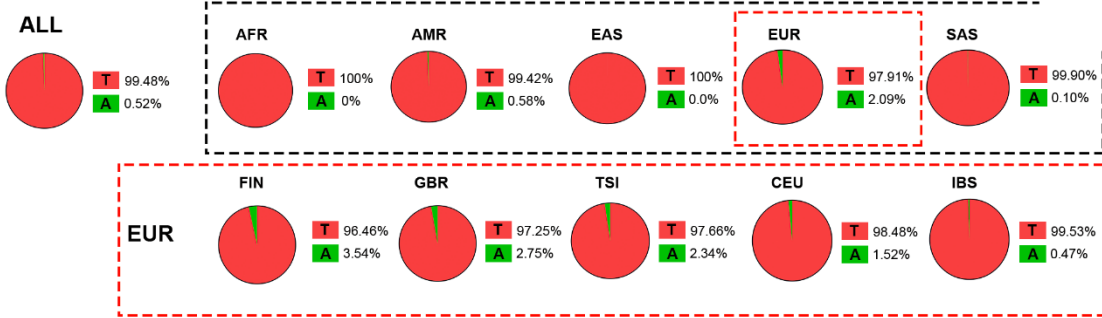

● rs769072620 (data from gnomAD genomes r3.0 allele frequencies and UK10K)

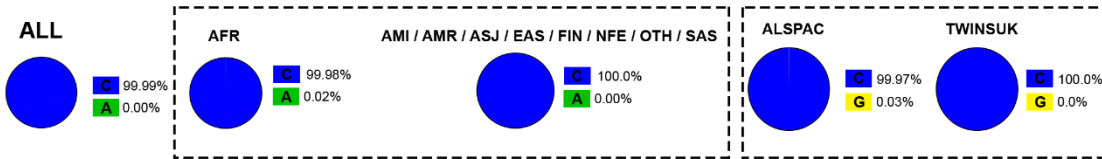

● rs529226880 (data from 1000 Genomes Project Phase 3)

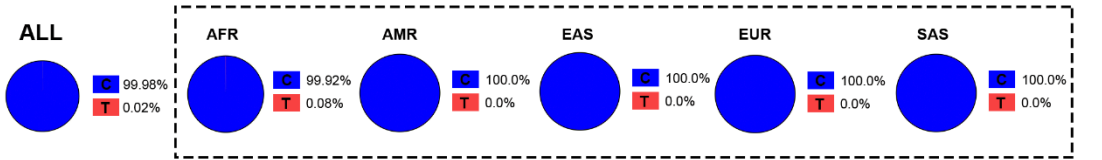

### Legend:

AFR: African    AMR: American    AMR: American    EAS: East Asian    EUR: European    SAS: South Asian  
CEU: Utah residents with Northern and Western European ancestry    FIN: Finnish from Finland    TSI: Toscani in Italy  
GRB: British in England and Scotland    IBS: Iberian populations in Spain    AMR: Latino/Admixed americano  
AMI: Amish    ASJ: Ashkenazi Jewish    NFE: Non-finish European  
ALSPAC: The Avon Longitudinal Study of Parents and Children (UK10K COHORT ALSPAC)    OTH: Other  
TWINSUK: Twin registry of 11,000 identical and non-identical twins (UK10K COHORT TWINSUK)

## G Effect of humans polymorphic variants on ECE18<sup>FragA</sup> activity

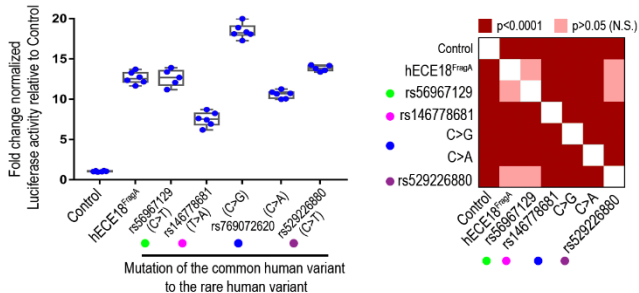



## H Activity of chimeric ECE18

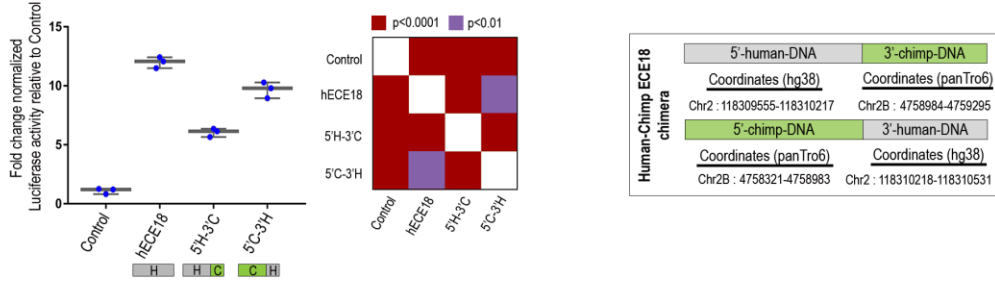

## I Coordinates of human ECE18<sup>fragA</sup> derived variants

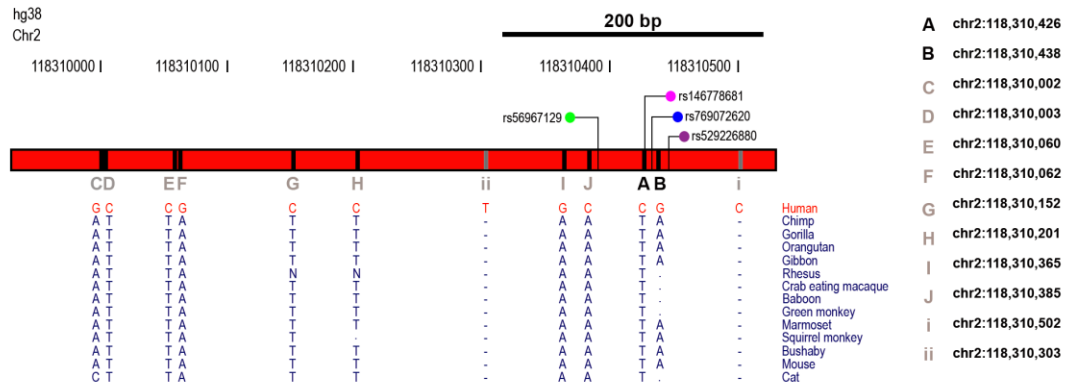

## J Effect of deleting human specific insertions on hECE18<sup>fragA</sup> activity

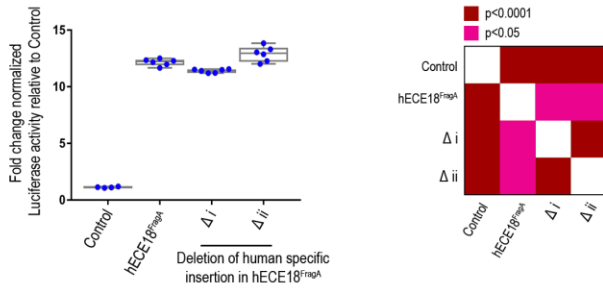

## K Effect of mutagenizing derived human variants to ancestral ape on hECE18 activity

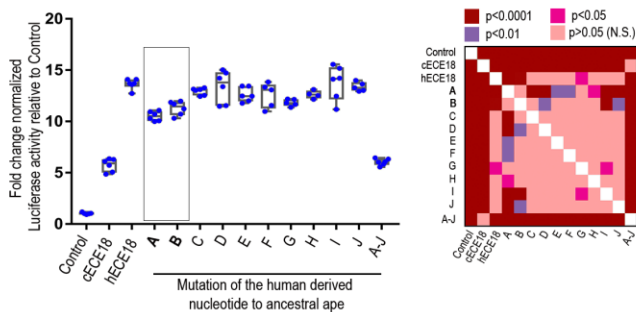

## L Multiz alignment of placental mammals at SP1<sup>A</sup> and SP1<sup>B</sup> motifs

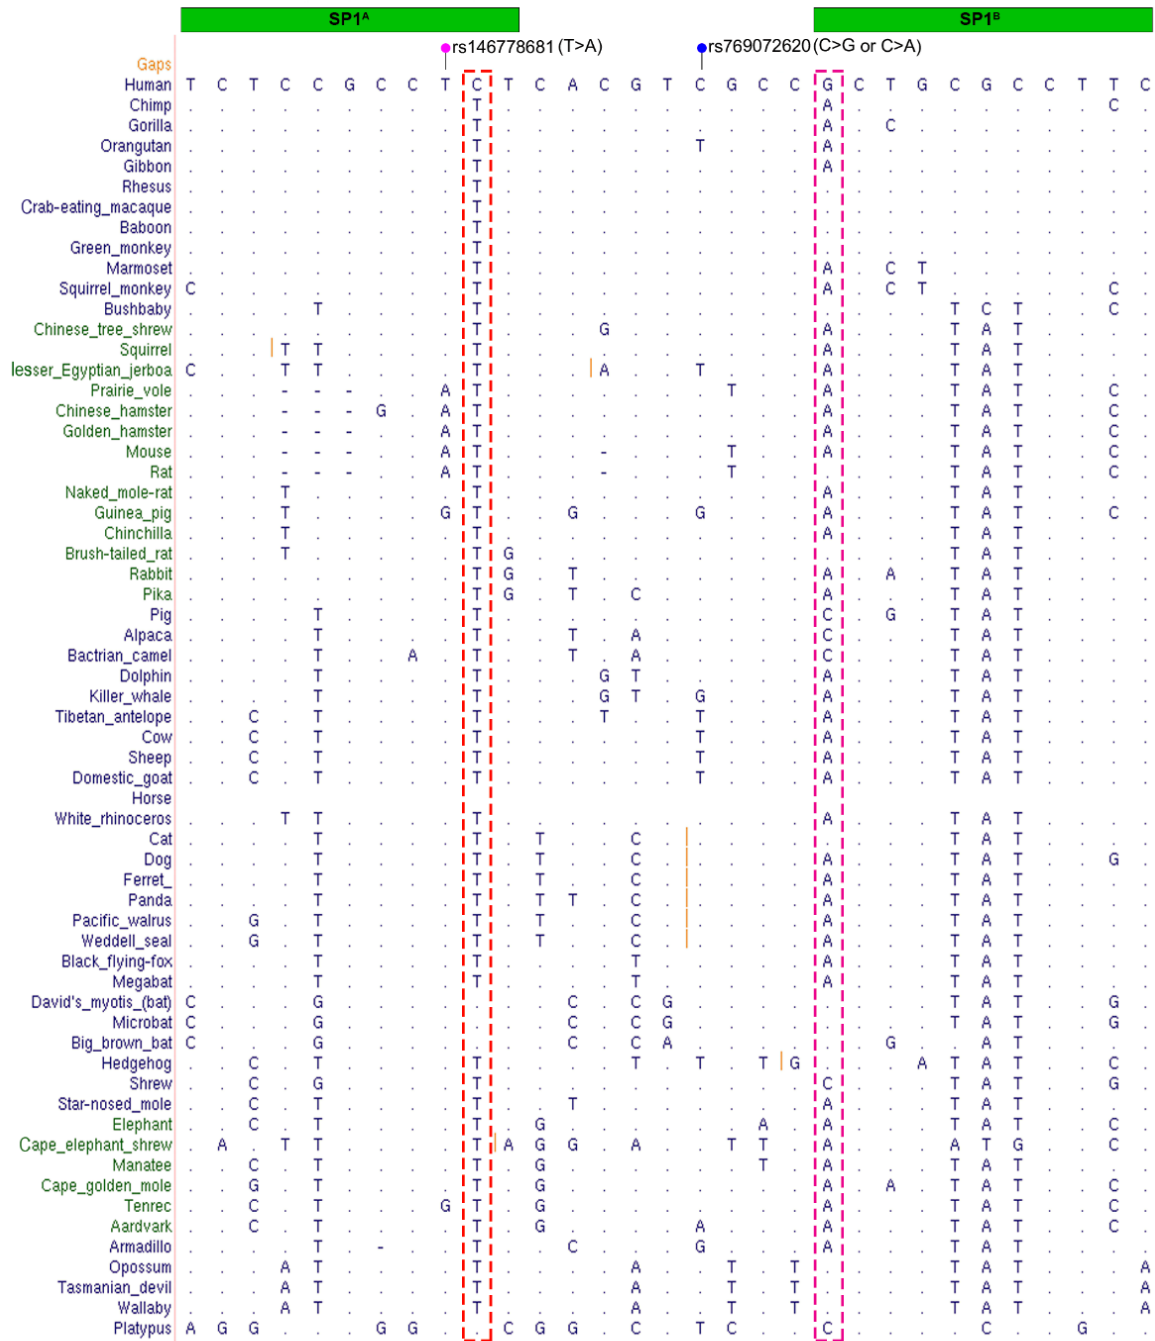

**Fig. S3. Mapping ECE18 enhancer activity. (A)** Multiz alignment of placental mammals centered on human ECE18 (hECE18). hECE18 was split into two fragments hECE18<sup>FragA</sup> and hECE18<sup>FragB</sup>. 2xHAR20 (dark grey) is a merged element that contains HACNS56, HAR19 and HAR80 (light grey) (6, 9, 10). Conserved elements used as kernels are (#124, #125, #126 and #127) shown in dark

blue. **(B)** Modified Stagia3 bidirectional luciferase lentiviral reporter vector used to test enhancer activity in cultured keratinocytes. LTR indicates long terminal repeat;  $\psi$ , packaging signal; RRE, rev response element; cPPT, central polypurine tract; SV40 polyA, simian vacuolating virus 40 polyadenylation signal; HSV TK promoter, Herpes simplex virus thymidine kinase promoter; cHS4core, insulator core derived from the chicken CHS4 element; Sequence to test; WPRE, woodchuck posttranscriptional regulatory element; bGH polyA, bovine growth hormone polyadenylation signal. **(C)** Coordinates of ECE18 mammalian homologs and fragments tested in this study. Genome builds are indicated. **(D)** Representative images of GFP antibody-stained sections from P2.5 forelimbs of hECE18<sup>FragA</sup> lentivirus-mediated transgenic mouse. GFP positive clones are visualized by HRP-DAB coupled immunohistochemistry so positive clones appear brown (black arrows). Dorsal hair follicle (blue arrow). **(E)** Comparative quantitative activity of mammalian ECE18<sup>FragA</sup> orthologs in cultured human GMA24F1A keratinocytes. Fold change normalized luciferase activity relative to Control (empty vector) is plotted. **(F)** Allele frequencies of polymorphic human variants rs56967129, rs146778681, rs769072620, rs529226880 are shown. Allele frequencies obtained from the 1000 Genomes Project Phase 3, gnomAD genomes r3.0 and UK10K datasets **(11–13)**. **(G)** Fold change normalized luciferase induction relative to Control (empty vector) by hECE18<sup>FragA</sup> containing minor allele at rs56967129, rs146778681, rs769072620 and rs529226880. **(H)** Fold change luciferase quantitative activity of hECE18 human: chimp chimeric enhancers relative to Control (empty vector). Maps of the human-chimp chimeric enhancers are shown (box). **(I)** Genomic location and alignments of derived human single nucleotide substitutions (A-J), derived human-specific insertions (i and ii), and modern human polymorphic variants (rs56967129, rs146778681, rs769072620, rs529226880) within hECE18<sup>FragA</sup> are shown. Coordinates in hg38. **(J)** Fold change normalized luciferase activity of hECE18<sup>FragA</sup> after deletion of derived human insertions i and ii. **(K)** Fold change luciferase activity relative to Control (empty vector) upon mutagenesis of hECE18 human derived variants A-J alone or all together to ancestral ape base. **(L)** Multiz alignments of placental mammals centered on the SP1<sup>A</sup> and SP1<sup>B</sup> motifs. A or B human derived variants are highlighted in red and pink, respectively. Human variants rs146778681 and rs769072620 are indicated. In panels **(E, G, H, J, K)** each point represents an

individual biological replicate and the median (line), 25%-75% percentiles (box bounds) and min and max (whiskers) are plotted. Significance determined by one-way *ANOVA* and Tukey's-adjusted *P*-values are shown in heatmaps. All assays performed in cultured human GMA24F1A keratinocytes.

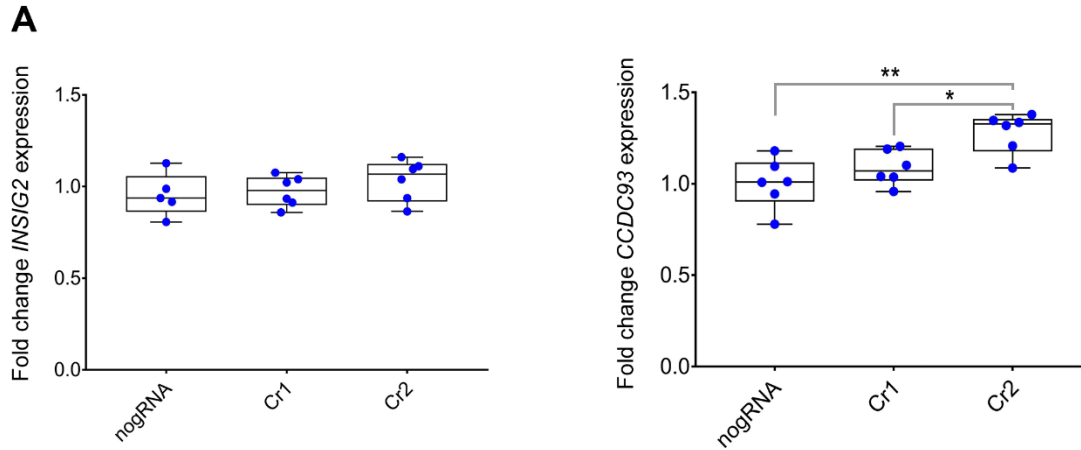

**Fig S4. Effect of hECE18 repression on *INSIG2* and *CCDC93* expression in human keratinocytes.** *INSIG2* and *CCDC93* are the only two protein-coding genes located within the EN1 topological associated domain (TAD). **(A)** Fold change expression of *INSIG2* and *CCDC93* upon dCas9-KRAB repression of hECE18 was assessed by qRT-PCR and calculated relative to dCAS9-KRAB transduction alone. Cr1 and Cr2 guide RNAs target hECE18. In graphs each point represents an individual biological replicate, median (line), 25%-75% percentiles (box bounds) and min and max (whiskers) are plotted and significance by one-way ANOVA. Tukey-adjusted P-values are reported. \*\*  $P < 0.01$ , \*  $P < 0.05$ . Data normalized to the human  $\beta$ -ACTIN gene. Experiments performed in cultured human GMA24F1A keratinocytes.

### A Generation of an ECE18 knock-out mouse (mECE18<sup>del</sup>)

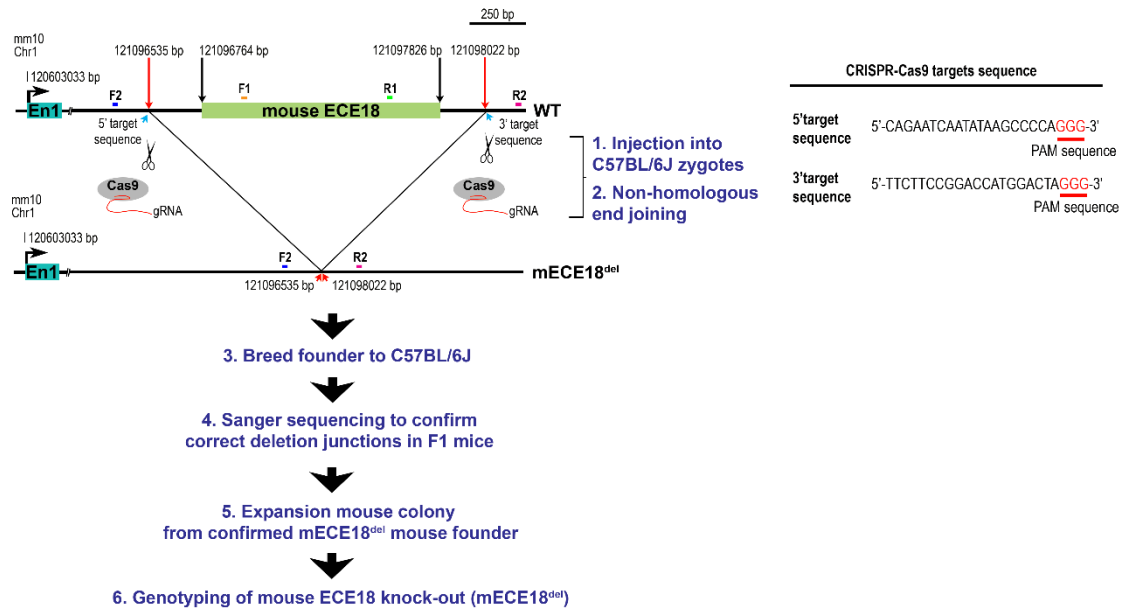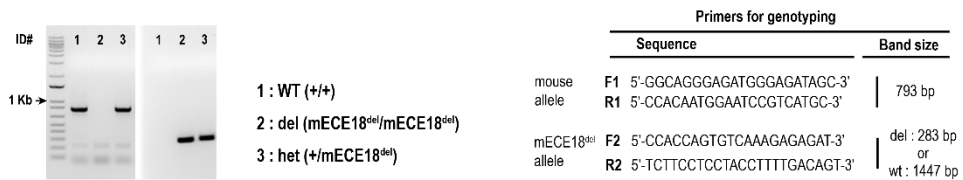

### B Allele specific expression of *En1* in P2.5 volar skin

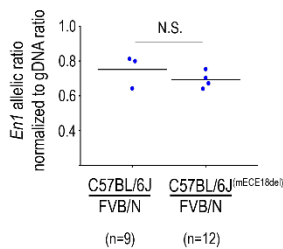

n = number of mice used in analysis

### C Number of eccrine glands in the interfootpad area of adult mice

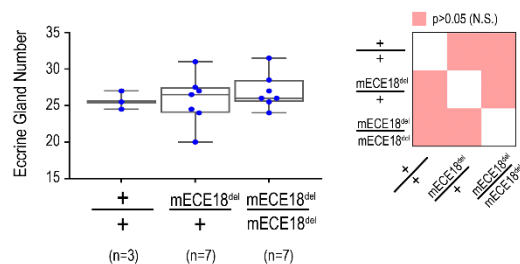

n = number of mice used in analysis

**Fig. S5. Generation and characterization of volar phenotypes of ECE18 knock-out mouse.**

**(A)** Generation of an ECE18 knock-out mouse (mECE18<sup>del</sup>) by CRISPR-Cas9 mediated genome editing. CRISPR-Cas9 target sequence and genotyping strategy are shown. Correct deletion junctions were confirmed by Sanger sequencing of F1 pups. **(B)** Normalized ratio of C57BL/6J : FVB/N allelic expression of *En1* from P2.5 volar forelimb of wildtype (C57BL/6J : FVB/N) and



mECE18del (C57BL/6J<sup>(mECE18del)</sup> : FVB/N) F1 hybrid mice. Ratios are normalized to the allelic ratio in F1 genomic DNA. Each point represents the mean value across three technical replicates for three or four biological samples consisting of pooled P2.5 volar skins from both forelimbs of three mice. **(C)** Quantification of the number of eccrine glands in the forelimb IFP of adult wildtype (+/+), mECE18<sup>del</sup> heterozygous (+/mECE18<sup>del</sup>) and homozygous mECE18<sup>del</sup>/ mECE18<sup>del</sup> mice. Each point represents the average number of IFP eccrine glands across both forelimbs of an individual mouse. The total number of animals analyzed per genotype (n). In panel **(B)** significance was assessed by a student's T-test (two-tailed). In panel **(C)** significance assessed by one-way ANOVA. Tukey-adjusted *P*-values are shown in a heatmap and the median (line), 25%-75% percentiles (box bounds) and min and max (whiskers) are plotted. N.S., not significant.

## A Generation of a human ECE18 knock-in (hECE18<sup>KI</sup>) mouse

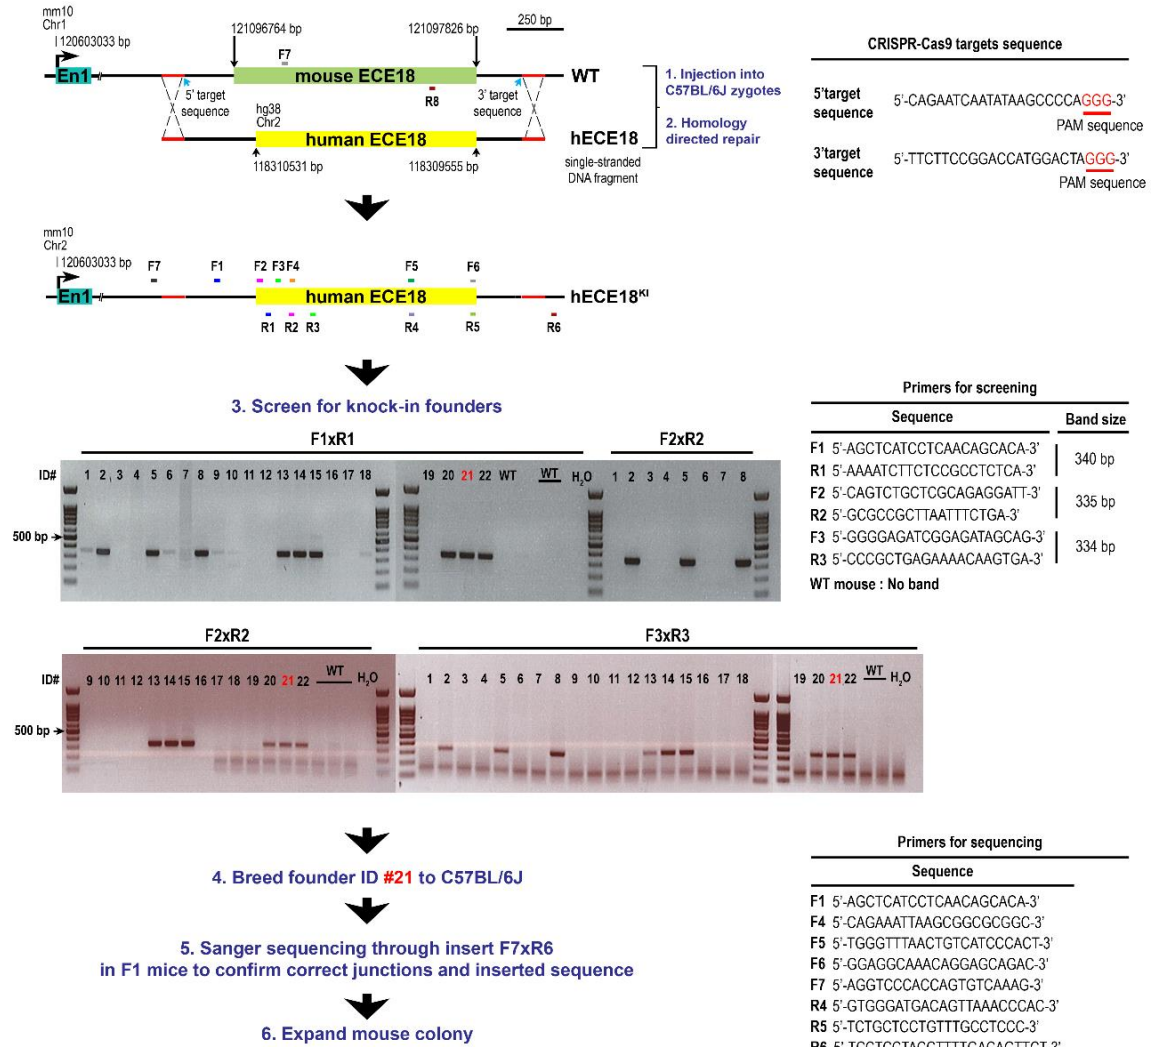

## B Genotyping of human ECE18 knock-in (hECE18<sup>KI</sup>) mouse

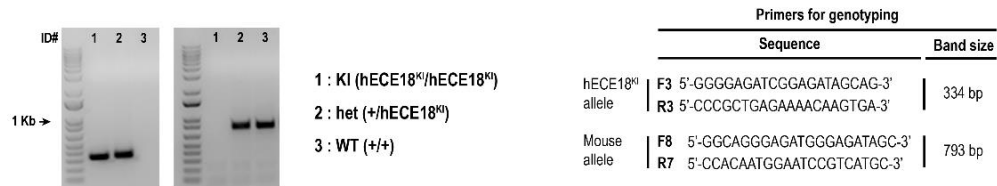

### C Strategy to confirm single homologous integration of human ECE18 into mouse genome

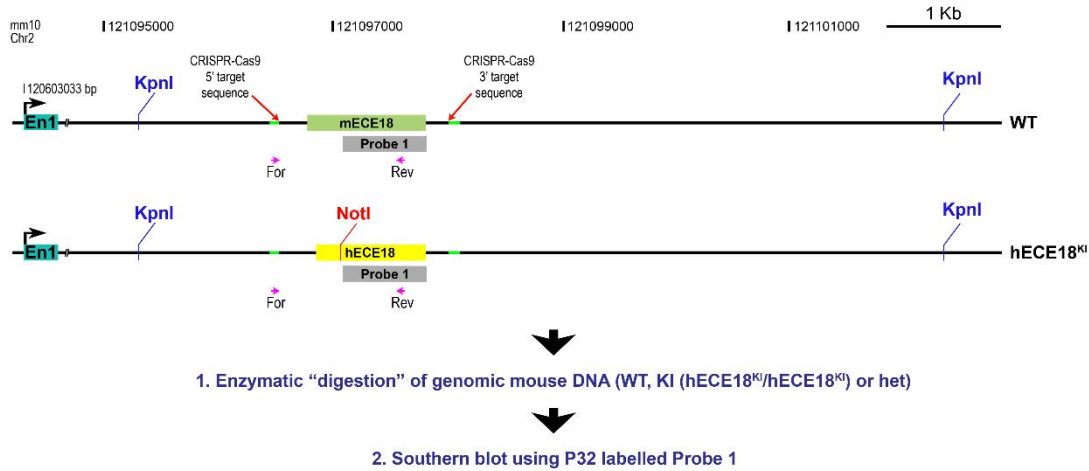

### D Genotyping

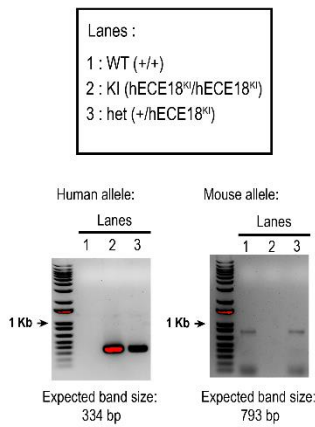

### E Southern blot

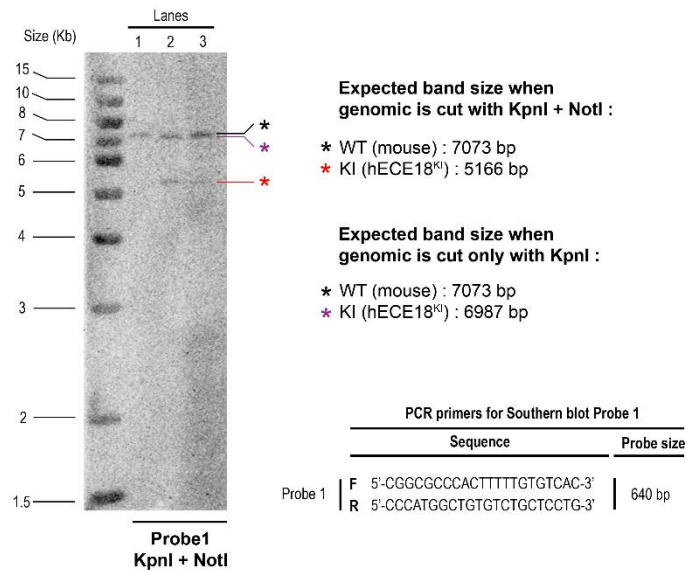

### F Enzymatic "digestion" of the fragment For x Rev

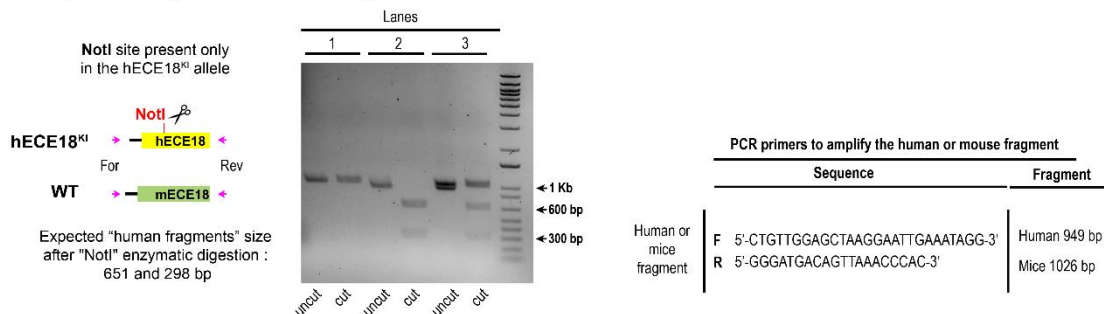

**Fig. S6. Generation of human ECE18 knock-in (hECE18<sup>KI</sup>) mice. (A)** Detailed overview of the generation of a human ECE18 knock-in mouse (hECE18<sup>KI</sup>). CRISPR-Cas9 technology was used

to replace the endogenous mouse ECE18 with the orthologous human ECE18 sequence. A single knock-in founder mouse (ID #21) was identified and bred to a C57BL/6J male generate F1 pups. F1 pups were screened to confirm transmission of the knock-in allele and correct targeting in 2 pups validated to have correct junctions and insert sequence were used to generate two hECE18<sup>KI</sup> lines. Each founder F1 mouse was bred onto C57BL/6J for two more generations prior to phenotypic analyses. Phenotypic analyses reported are based on progeny derived from both F1 founder lines at the N3 generation. CRISPR-Cas9 targets sequence, and primers used are listed.

**(B)** Representative agarose gel for genotyping hECE18<sup>KI</sup> mice. Sequences of genotyping primers used are shown. **(C)** Schematic of secondary Southern and long-range PCR/species specific restriction digest strategies to validate single homologous integration of hECE18 into hECE18<sup>KI</sup> mice. KpnI and NotI sites are shown. **(D)** Genotyping PCR to determine genotype of mice used as source of genomic DNA for the southern blot in E and long-range PCR in F. Primers for genotyping listed in B and are species specific. **(E)** Autoradiograph of genomic southern blot using P32 labelled Probe 1 is shown. Sequences of primers used to amplify Probe 1 are shown and Probe target sequence is shown in C. Due to sequence conservation, probe against ECE18 (Probe1) cannot distinguish between mouse and human sequence, however hECE18 contains a unique NotI site that is not present in the orthologous mouse ECE18 genomic sequence. Thus, digest with NotI was used to validate integration of hECE18 in KI and het mouse genomic DNA. Presence of uncut KpnI fragment in KI and het lanes is due to incomplete NotI digest of genomic DNA. This is likely the result of partial CpG methylation of the hECE18 sequence, which blocks NotI cleavage, and is consistent with the observation that the enhancer is inactive in some tissues used as the source material for genomic DNA (tail biopsies). **(F)** A secondary strategy was used in F to confirm identify of sequence within swapped region. Enzymatic digestion of the long-range PCR amplified DNA fragment from WT, KI (hECE18<sup>KI</sup>/ hECE18<sup>KI</sup>) and het (+/hECE18<sup>KI</sup>) mice. Primers used to amplify the genomic DNA fragments are listed. NotI enzyme cut uniquely in the human fragment. WT, wild type. KI, hECE18 knock-in homozygote. het, hECE18 KI heterozygote.

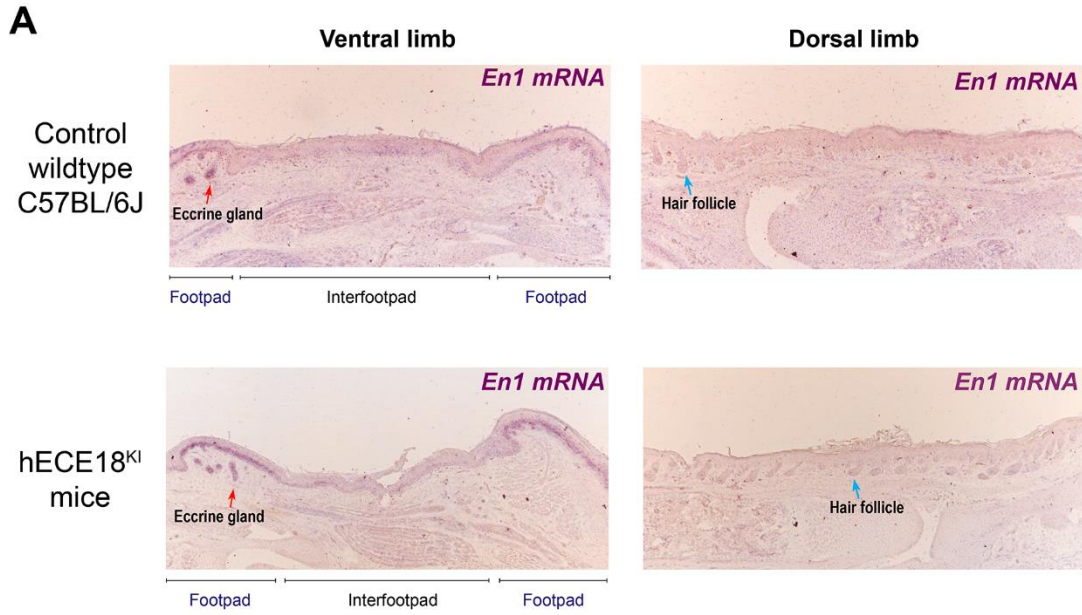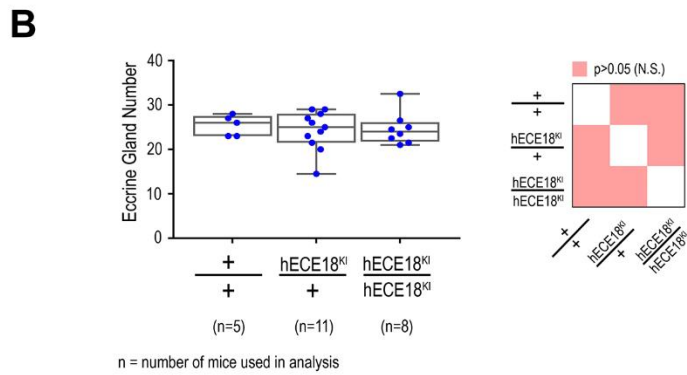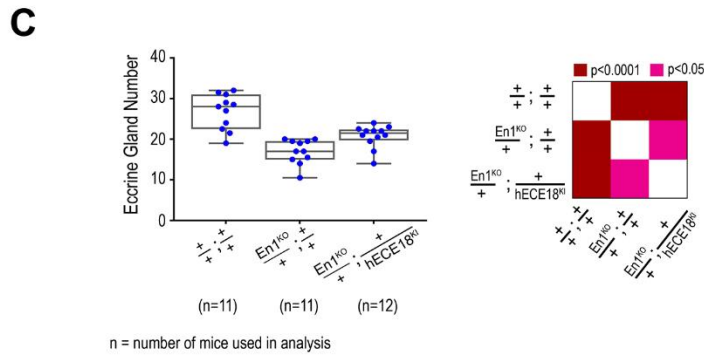

**Fig. S7. Effect of hECE18<sup>Kl</sup> and En1<sup>KO</sup> alleles on mouse *En1* expression and interfootpad eccrine gland number. (A) Spatial *En1* mRNA expression in Control (+/+) and hECE18<sup>Kl</sup> (hECE18<sup>Kl</sup>/hECE18<sup>Kl</sup>) mice. Representative images of the ventral limb, and the hairy dorsal limb at P2.5 stage is shown for both genotypes. *En1* mRNA transcripts are detected using anti-DIG alkaline**

phosphatase coupled antibody and appear in purple. **(B)** Effect of hECE18 on IFP eccrine gland number in a wildtype genetic background. IFP eccrine gland number in the forelimb adult wildtype (+/+), +/hECE18<sup>KI</sup> and hECE18<sup>KI</sup>/hECE18<sup>KI</sup> mice is plotted. **(C)** Effect of En1<sup>KO</sup> allele on eccrine gland number. The number of eccrine glands in the forelimb IFP of adult +/+; +/+, En1<sup>KO</sup>/+; +/+, and En1<sup>KO</sup>/+; +/hECE18<sup>KI</sup> mice is plotted. Values for animals carrying En1<sup>KO</sup> are also reported in the main text in Fig.3g. In panels **(B, C)** each point represents the average number of IFP eccrine glands across both forelimbs of an individual mouse and median (line), 25%-75% percentiles (box bounds) and min and max (whiskers) are plotted. The total number of animals analyzed per genotype (n). Significance was assessed by one-way ANOVA and Tukey-adjusted *P*-values are reported in heatmaps. +, wildtype allele. KI, knock-in. KO, knock-out. N.S., not significant.



**Table S1:** Primers used to subclone ECEs in mouse transgenic assays<sup>#</sup>

| ECE         | Forward sequence                                  | Reverse sequence                                |
|-------------|---------------------------------------------------|-------------------------------------------------|
| mouse-ECE1  | accaattgctcgaggGTGCATTTATCATCCTATTACT             | gtcaagctccattatagTTACACAGAGGCTAGATTGG           |
| mouse-ECE2  | tcgatagtcgaccaattgctcgaggCCCAAATCCCTGCCGCTTCT     | cccttgctcaccatggtggcTCTTTGCTTTTTGCAGGGAGAGCGC   |
| mouse-ECE3  | accaattgctcgaggCCTTTGCTGGAGCACCTA                 | gtcaagctccattatagGTCACCTCCTCCACATTAA            |
| mouse-ECE4  | accaattgctcgaggCAATCAGGGCGACAG                    | gtcaagctccattatagTGGTCGCCACACAGTA               |
| mouse-ECE5  | accaattgctcgaggGAGAACTGCCTGTCCCGT                 | gtcaagctccattatagCACCAGGCTCTGTATGTA             |
| mouse-ECE6  | cgaccaattgctcgaggCTAGGAGACAGCCTTCTGGAGG           | cgggtcaagctccattatagTGGCATGCCCTGCAAGTCTGAC      |
| mouse-ECE7  | accaattgctcgaggGTACTIONACTGGATCTGAA               | gtcaagctccattatagACTGCCTGAGTCATCTCC             |
| mouse-ECE8  | accaattgctcgaggATAACTGAGTTTGGTTTA                 | gtcaagctccattatagTGCTCAGCCCCTCCTCAG             |
| mouse-ECE9  | accaattgctcgaggACTGAGCTACATCCGTGG                 | gtcaagctccattatagTCTGTCATATACTTCTCG             |
| mouse-ECE10 | accaattgctcgaggCAGAACCTTCTGTATTTA                 | gtcaagctccattatagCAAGTGCTCTCTCACAGG             |
| mouse-ECE11 | agtgcgaccaattgctcgaggCTCAGTGAGTCTTGACAAGCC        | tccgggtcaagctccattatagGTGATTCTCTGACCTCTGCATGC   |
| mouse-ECE12 | accaattgctcgaggGCTCCTCTTTCCCAACAA                 | gtcaagctccattatagCATGATTGTCAGTGGTCC             |
| mouse-ECE13 | accaattgctcgaggCTTATTGATTGGATATATG                | gtcaagctccattatagCCAGTGAGCATAGCAGTGG            |
| mouse-ECE14 | agtgcgaccaattgctcgaggTGAGGACCTGAGTTCAAATCCC       | tccgggtcaagctccattatagCCATATAGACAGGCACATGCAC    |
| mouse-ECE15 | accaattgctcgaggCCTTTGCAGACCTAGAAT                 | gtcaagctccattatagGGAGAACAACCACCCAG              |
| mouse-ECE16 | agtgcgaccaattgctcgaggCCATCCTGAGTCAAGGGCGG         | gtcaagctccattatagCTTCAGAACTCAGAGTAGGGTCAAGC     |
| mouse-ECE17 | accaattgctcgaggCATGCATTATATTTACATCA               | gtcaagctccattatagGGAAGTACCAATGAATCACA           |
| mouse-ECE18 | agtgcgaccaattgctcgaggTGTGTTTGCCTCCTACAATGGGAGGATA | gtcaagctccattatagGCTGAAGTTTTCTTTCTGTTTACCAGGAAG |
| chimp-ECE18 | accaattgctcgaggCCTGTTTGCCTCCCATAATA               | gtcaagctccattatagCAGAAGTTTTCTTTCTGTT            |
| human-ECE18 | accaattgctcgaggCCTGTTTGCCTCCCATAATA               | gtcaagctccattatagCAGAAGTTTTCTTTCTGTT            |
| mouse-ECE19 | agtgcgaccaattgctcgaggTGTTGGAATAAGGGCACACC         | tccgggtcaagctccattatagGACACTGCTGCCTTCTCTATTC    |
| mouse-ECE20 | accaattgctcgaggCACATTCAAGGTCAATG                  | gtcaagctccattatagGCAGCAGTGAGTGTG                |
| mouse-ECE21 | accaattgctcgaggCACAATTGCCTCTTTAGGT                | gtcaagctccattatagCAAGGATGTTTTCAAATTAG           |
| mouse-ECE22 | agtgcgaccaattgctcgaggCCTGACCTATCTGCCATCTCC        | tccgggtcaagctccattatagGCCTACACGTTAAGCAATAGGGT   |
| mouse-ECE23 | accaattgctcgaggTCTCTGCATAACAGCCCT                 | gtcaagctccattatagGCACTTTAATCACTAAGC             |

<sup>#</sup>Lower case sequence indicates homology arms to Stagia3 vector

**Table S2:** Primers used to clone ECE18 orthologs into bidirectional luciferase reporter vector<sup>#</sup>

| <b>ECE</b>          | <b>Forward sequence</b>                            | <b>Reverse sequence</b>                                  |
|---------------------|----------------------------------------------------|----------------------------------------------------------|
| cat-ECE18           | agagatttagaatgacagggGAGGGATAGGAATAGAAAAGGCC        | tcaagcttcattatataagaattccAAGTTTTCTTTGCTGTTTACCGG         |
| cat-ECE18-FragA     | gaaagagagatttagaatgacagggCAACATATCGGGCTTACAAATTATC | tcaagcttcattatataagaattccAAGTTTTCTTTGCTGTTTACCGG         |
| mouse-ECE18         | agagatttagaatgacagggTGTGTTTGCCTCCTACAATGGG         | gctccattatataagaattccCTGAAGTTTTCTTTCTGTTTACCAGG          |
| mouse-ECE18-FragA   | gaaagagagatttagaatgacagggCAACATATCGCGCTTACAAATTATC | gctccattatataagaattccCTGAAGTTTTCTTTCTGTTTACCAGG          |
| bushbaby-ECE18      | agagatttagaatgacagggCGTGTGTTTGCCTCCCACAATAAGAGG    | ctccattatataagaattccGGAAAGTTTTCTTTCTGTTTACCAAGGAG        |
| marmoset-ECE18      | agagatttagaatgacagggCCTGTTTGCCTCCCACAATAAGAG       | ctccattatataagaattccCAAAAGTTTTCTTTCTGTTTACCGGGG          |
| macaque-ECE18       | agagatttagaatgacagggCCTGTTTGCCTCCCATAGTAAGAGG      | agctccattatataagaattccCAAAAGTTTTCTTTCTGTTTGTCCGGG        |
| macaque-ECE18-FragA | agagatttagaatgacagggCAACATATCGCGCTTACAAATTAT       | agctccattatataagaattccCAAAAGTTTTCTTTCTGTTTGTCCGGG        |
| gorilla-ECE18-FragA | agagatttagaatgacagggCAACATATCGCGCTTACAAATTAT       | ctccattatataagaattccCAGAAGTTTTCTTTCTGTTTACCGGG           |
| chimp-ECE18         | agagatttagaatgacagggCCTGTTTGCCTCCCATAATAAGAGG      | ctccattatataagaattccCAGAAGTTTTCTTTCTGTTTACCGGG           |
| chimp-ECE18-FragA   | agagatttagaatgacagggCAACATATCGCGCTCGCAA            | ctccattatataagaattccCAGAAGTTTTCTTTCTGTTTACCGGG           |
| human-ECE18         | agagatttagaatgacagggCCTGTTTGCCTCCCATAATAAGAGG      | ctccattatataagaattccCAGAAGTTTTCTTTCTGTTTACCGGG           |
| human-ECE18-fragA   | agagatttagaatgacagggCAACATATCGCGCTTACAAATTAT       | agctccattatataagaattccCAGAAGTTTTCTTTCTGTTTACCGGGGAGGGGAG |
| human-ECE18-fragB   | agagatttagaatgacagggCCTGTTTGCCTCCCATAATAAGAGG      | gtcaagcttcattatataagaattccTTGTTTTCTCAGCGGGCCCC           |

<sup>#</sup>Lowercase sequence indicates homology arm to vector.

**Table S3:** Primers used mutagenesis of ECE18<sup>#</sup>

| ECE                               | Unique primer                                                |
|-----------------------------------|--------------------------------------------------------------|
| hECE18-Mut-A                      | GGAAATGAAAATCTTCTCCGCCTtTCACGTCGCCGCTGCG                     |
| hECE18-Mut-B                      | CGCCTCTCACGTCGCCaCTGCGCCTTCAAATCCTCTGC                       |
| hECE18-Mut-C                      | CCTCACCTAATGCAAATGGAaCGGAGGCCTCTGTTATTGTATT                  |
| hECE18-Mut-D                      | CCTCACCTAATGCAAATGGAGtGGAGGCCTCTGTTATTGTATT                  |
| hECE18-Mut-E                      | TTAATCCGGCTTAGCtCGCTTAATGATGCCA                              |
| hECE18-Mut-F                      | AATCCGGCTTAGCCCaCTTAATGATGCCACT                              |
| hECE18-Mut-G                      | ATCGGGCCCCGCTGAGAAAAaAAGTGACACAAAAAGTGGGCG                   |
| hECE18-Mut-H                      | CGCCCGCGATGGCGCtGATGGCTGATGCCGCGATTACGCC                     |
| hECE18-Mut-I                      | CTATCTCCGATCTCCCCGCCaGGTTTTTCATACTGATATTCTTTGCACCCC          |
| hECE18-Mut-J                      | GGTTTTTCATACTGATATTaTTTGCACCCCGTAACACAGG                     |
| hECE18-FragA-rs56967129 C>T       | TTTCATACTGATATTtTTTGCACCCCGTAAC                              |
| hECE18-FragA-rs146778681 T>A      | AAAATCTTCTCCGCCaCTCACGTCGCCGCTG                              |
| hECE18-FragA-rs769072620 C>G      | CTCCGCCTCTCACGTgGCCGCTGCGCCTTC                               |
| hECE18-FragA-rs769072620 C>A      | CTCCGCCTCTCACGTaGCCGCTGCGCCTTCA                              |
| hECE18-FragA-rs529226880 C>T      | CCTTCAAATCCTCTGtGAGCAGACTGGCCTC                              |
| hECE18-del-insertion_i            | CGGCCCCCTCCCGGGCTCCCTCCCCGGTAAACAGAAAAGA                     |
| hECE18-del-insertion_ii           | GAAGAGATTTATATTTTTTTTGTGTCAGGAAATGAACAAA                     |
|                                   |                                                              |
| gECE18-Mut1                       | GCGGAGAAGTCTATgAACTACTTCCATTAATAATGC                         |
| gECE18-Mut2                       | CGCCGCCCGCGATGGCGCtGgTGGCTGATGCCGCG                          |
| gECE18-Mut3                       | TGAAGAGATTTATATTTTTTTTGTGTCAGGAAATG                          |
| gECE18-Mut4                       | CTTCTCCGCCTtTCACGTCGCCCaCcGCGCCTTCAA                         |
| gECE18-Mut5                       | CACCGGCCCCtTCCCGGGCTCCCTCCCCGGTAAAC                          |
|                                   |                                                              |
| hECE18_FragA-del_in_human_SP1A    | CCCGTAACACAGGAAATGAAAATCTCACGTCGCCGCTGCGCCTTC                |
| hECE18_FragA-del_in_human_SP1B    | CTTCTCCGCCTCTCACGTCGCCAAATCCTCTGCGAGCAGACTGG                 |
| mECE18_FragA-add_in_mouse_hSP1A_B | GAAATGAAAATCTTCTCCGCCTCTCACGTCGCCGCTGCGCCTTCAAATCCTCTGCGAACA |
| mECE18_FragA-add_in_mouse_hSP1A   | TGAAAATCTTCTCCGCCTCTCAGTCTCCACTGTATCTCAAATCC                 |
| mECE18_FragA-add_in_mouse_hSP1B   | CAGGAAATGAAAATCTTCTCCATTACGTCGCCGCTGCGCCTTCAAATCCTCTGCGAACA  |
|                                   |                                                              |
| Chimera-5'-human-chimp-3'-F       | CGCCGATGGCTGATGCCGCGATTACGCCGGCGGGGGCGGCCCGC                 |
| Chimera-5'-human-chimp-3'-R       | GCCGCCCCCGCCGGCGTAATCGCGGCATCAGCCATCGGCGCCATC                |
|                                   |                                                              |
| Chimera-5'-chimp-human-3'-F       | CGCTGATGGCTGATGCCGCGATTACGCCGGCGGGGGCGGCCCGC                 |
| Chimera-5'-chimp-human-3'-F       | GCCGCCCCCGCCGGCGTAATCGCGGCATCAGCCATCAGCGCCAT                 |

<sup>#</sup>Lowercase nucleotide indicates the base changed in mutagenesis.

**Table S4:** CHIP-qPCR and qRT-PCR primer sequences

| <b>Name</b>     | <b>Specie</b> | <b>Forward sequence</b>  | <b>Reverse sequence</b>  |
|-----------------|---------------|--------------------------|--------------------------|
| SP1A/B (hECE18) | Human         | TGAAAATCTTCTCCGCCTCTCACG | CCAGTCTGCTCGCAGAGGAT     |
| HBG2 promoter   | Human         | CCAAGGTCATGGATCGAGTT     | ACACTGTGACAGCTGGGATG     |
| En1             | Mouse         | GTGGTCAAGACTGACTCACAGC   | GCTTGTCTTCCTTCTCGTTCTT   |
| Rpl13a          | Mouse         | CAGTGCGCCAGAAAATGC       | GAAGGCATCAACATTTCTGGAA   |
| EN1             | Human         | TTCGGATCGTCCATCCTCC      | GCTCCGTGATGTAGCGGTTT     |
| INSIG2          | Human         | TTGCTGGAGGCATAACAATGGG   | TGCCTTCTTCATTCTGATGAGATT |
| CCDC93          | Human         | TGAACGACCAGTACTTGGAGCTG  | GGATGTTTCCAGGAGGCCTTCG   |
| Beta-ACTIN      | Human         | CATGTACGTTGCTATCCAGGC    | CTCCTTAATGTCACGCACGAT    |

## SI References

1. G. Andrey, *et al.*, Characterization of hundreds of regulatory landscapes in developing limbs reveals two regimes of chromatin folding. *Genome Res.* **27**, 223–233 (2017).
2. C. A. Davis, *et al.*, The Encyclopedia of DNA elements (ENCODE): data portal update. *Nucleic Acids Res.* **46**, D794–D801 (2018).
3. D. Aldea, *et al.*, The Transcription Factor Deaf1 Modulates Engrailed-1 Expression to Regulate Skin Appendage Fate. *J. Invest. Dermatol.* **139**, 2378–2381.e4 (2019).
4. J. A. Capra, G. D. Erwin, G. McKinsey, J. L. R. Rubenstein, K. S. Pollard, Many human accelerated regions are developmental enhancers. *Philos. Trans. R. Soc. Lond., B, Biol. Sci.* **368**, 20130025 (2013).
5. K. S. Pollard, *et al.*, Forces shaping the fastest evolving regions in the human genome. *PLoS Genet.* **2**, e168 (2006).
6. S. Prabhakar, J. P. Noonan, S. Pääbo, E. M. Rubin, Accelerated evolution of conserved noncoding sequences in humans. *Science* **314**, 786 (2006).
7. S. Joost, *et al.*, Single-Cell Transcriptomics Reveals that Differentiation and Spatial Signatures Shape Epidermal and Hair Follicle Heterogeneity. *cells* **3**, 221–237.e9 (2016).
8. S. Liu, H. Zhang, E. Duan, Epidermal Development in Mammals: Key Regulators, Signals from Beneath, and Stem Cells. *International Journal of Molecular Sciences* **14**, 10869–10895 (2013).
9. J. A. Capra, G. D. Erwin, G. McKinsey, J. L. R. Rubenstein, K. S. Pollard, Many human accelerated regions are developmental enhancers. *Philos Trans R Soc Lond B Biol Sci* **368** (2013).
10. K. S. Pollard, *et al.*, Forces Shaping the Fastest Evolving Regions in the Human Genome. *PLoS Genet* **2** (2006).
11. 1000 Genomes Project Consortium, *et al.*, A global reference for human genetic variation. *Nature* **526**, 68–74 (2015).
12. K. J. Karczewski, *et al.*, The mutational constraint spectrum quantified from variation in 141,456 humans. *Nature* **581**, 434–443 (2020).
13. UK10K Consortium, *et al.*, The UK10K project identifies rare variants in health and disease. *Nature* **526**, 82–90 (2015).
